# Supplementary material
Source: PubMed Central journal article supplement (PMC4114315)
Supplement: NIHMS554422-supplement-SI.pdf [file NIHMS554422-supplement-SI.pdf]

# Preparation and Purification of Zinc Sulphinate Reagents for Organic Synthesis

Fionn O'Hara<sup>1</sup>, Ryan D. Baxter<sup>1</sup>, Alexander G. O'Brien<sup>1</sup>, Michael R. Collins<sup>2</sup>, Janice A. Dixon<sup>1</sup>,  
Yuta Fujiwara<sup>1</sup>, Yoshihiro Ishihara<sup>1</sup> & Phil S. Baran<sup>1</sup>

<sup>1</sup>Department of Chemistry, The Scripps Research Institute, 10550 North Torrey Pines Road, La Jolla, California 92037, and <sup>2</sup>Department of Chemistry, La Jolla Laboratories, Pfizer Inc., 10770 Science Center Drive, San Diego, California 92121  
e-mail: pbaran@scripps.edu

## SUPPLEMENTARY INFORMATION

### Table of Contents

|                                                                |      |        |
|----------------------------------------------------------------|------|--------|
| X-ray structures of TFMS•THF complex and DFMS (2).....         | page | S2     |
| Mass analysis .....                                            | page | S3–S5  |
| Determination of chloride incorporation .....                  | page | S6–S14 |
| Elemental analysis of TFMS (1), before and after washing ..... | page | S7     |
| Elemental analysis of DFMS (2), before and after washing ..... | page | S9     |
| Elemental analysis of TFES (3), before and after washing ..... | page | S11    |
| Elemental analysis of IPS (4), before and after washing .....  | page | S13    |

All the synthesized zinc sulphinate reagents can be represented as  $(\text{RSO}_2)_2\text{Zn}$  but these are most likely dihydrates in their solid state. The X-ray structures and the elemental analyses shown hereafter support this hypothesis.

### X-ray structures of TFMS•THF complex and DFMS (2)

X-ray quality crystals of TFMS were obtained by recrystallization from THF. While each zinc atom is hexacoordinate, THF occupies some coordination sites and therefore there are only two trifluoromethanesulphonate units per zinc atom. There are two molecules of THF per molecule of  $(\text{CF}_3\text{-SO}_2)_2\text{Zn}$  and the THF most likely displaced two molecules of water during the recrystallization process. (This crystal structure has been deposited at the Cambridge Crystallographic Data Centre with CCDC # 916882.)

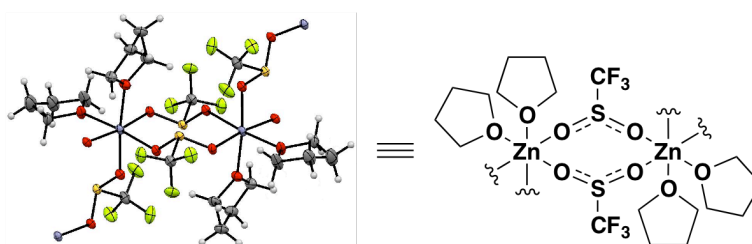

**Polymeric  $(\text{CF}_3\text{-SO}_2)_2\text{Zn}\cdot[\text{C}_4\text{H}_8\text{O}]_2$**   
X-ray analysis obtained by crystallization of TFMS (1) in THF

The X-ray structure of DFMS (2) shows a polymeric formula of  $[(\text{CF}_2\text{H-SO}_2)_3\text{Zn}]_2\cdot\text{Zn}(\text{H}_2\text{O})_6$ , representing an average of two molecules of water per molecule of  $(\text{CF}_2\text{H-SO}_2)_2\text{Zn}$ . (This crystal structure has been reported previously with CCDC # 877399, see ref. 3 of this article.)

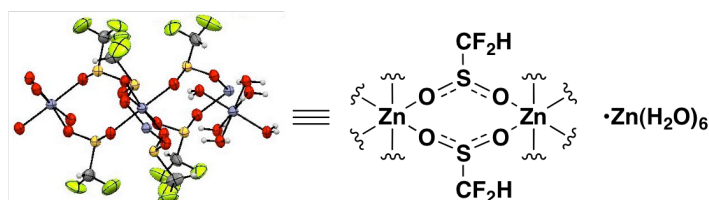

**$[(\text{CF}_2\text{H-SO}_2)_3\text{Zn}]_2\cdot\text{Zn}(\text{H}_2\text{O})_6$**   
**= Polymeric  $(\text{CF}_2\text{H-SO}_2)_2\text{Zn} \cdot 2 \text{H}_2\text{O}$**   
DFMS (2)

Note: No evidence of chloride was observed in the crystal structures of TFMS or DFMS.

## Mass analysis

The molar masses of the zinc sulphinate reagents prepared in this article are as follows:

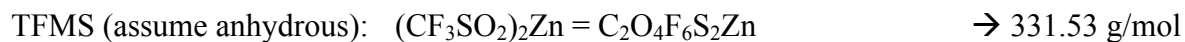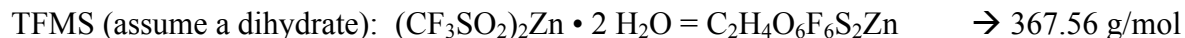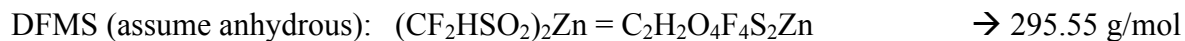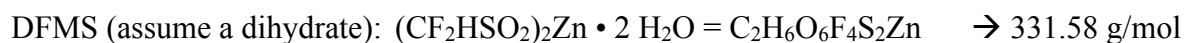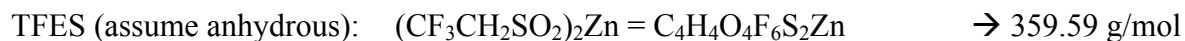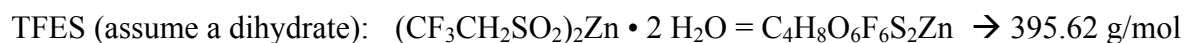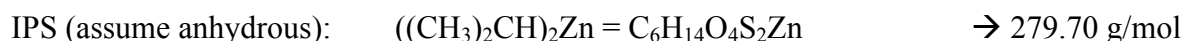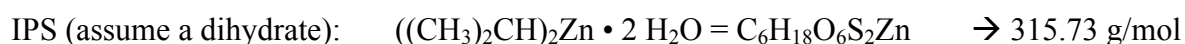

Assuming anhydrous salts, the % (by mass) distribution of each atom is as follows:

Table S1. Calculated values of % by mass for the zinc sulphinate reagents (assuming anhydrous).

| Zn salt | %C  | %H   | %O | %F | %S | %Cl | %Zn |
|---------|-----|------|----|----|----|-----|-----|
| TFMS    | 7.2 | 0    | 19 | 34 | 19 | 0   | 20  |
| DFMS    | 8.1 | 0.68 | 22 | 26 | 22 | 0   | 22  |
| TFES    | 13  | 1.1  | 18 | 32 | 18 | 0   | 18  |
| IPS     | 26  | 5.0  | 23 | 0  | 23 | 0   | 23  |

Assuming dihydrate salts, the % (by mass) distribution of each atom is as follows:

Table S2. Calculated values of % by mass for the zinc sulphinate reagents (assuming dihydrates).

| Zn salt | %C  | %H  | %O | %F | %S | %Cl | %Zn |
|---------|-----|-----|----|----|----|-----|-----|
| TFMS    | 6.5 | 1.1 | 26 | 31 | 17 | 0   | 18  |
| DFMS    | 7.2 | 1.8 | 29 | 23 | 19 | 0   | 20  |
| TFES    | 12  | 2.0 | 24 | 29 | 16 | 0   | 17  |
| IPS     | 23  | 5.7 | 30 | 0  | 20 | 0   | 21  |

Elemental analysis before washing with 1:1 EtOAc:CH<sub>2</sub>Cl<sub>2</sub> (also see attached data sheets):

Table S3. Experimental values of % by mass for the zinc sulphinate reagents before purification.

| Zn salt | %C    | %H   | %S    | %Cl   |
|---------|-------|------|-------|-------|
| TFMS    | 4.38  | 2.35 | 11.55 | 12.47 |
| DFMS    | 5.15  | 2.17 | 11.79 | 12.83 |
| TFES    | 8.72  | 2.43 | 11.50 | 9.86  |
| IPS     | 16.54 | 3.95 | 14.75 | 16.06 |

These results suggest that the zinc sulphinate reagents most likely contain  $\text{ZnCl}_2$  and  $\text{H}_2\text{O}$ . When normalized to 1 equiv. of zinc sulphinate reagent (calculated from %S), almost 1 equiv. of  $\text{ZnCl}_2$  (calculated from %Cl) and a few equivalents of  $\text{H}_2\text{O}$  (calculated from %H, taking into account the number of hydrogens from the zinc sulphinate salts) were present for each salt that was analyzed:

Table S4. Experimental values for the number of equivalents of each component in the product before purification.

| <b>Zn salt</b> | <b><math>(\text{RSO}_2)_2\text{Zn} \cdot 2 \text{H}_2\text{O}</math></b> | <b><math>\text{ZnCl}_2</math></b> | <b><math>\text{H}_2\text{O}</math></b> |
|----------------|--------------------------------------------------------------------------|-----------------------------------|----------------------------------------|
| TFMS           | 1.00 equiv.                                                              | 0.98 equiv.                       | 6.5 equiv.                             |
| DFMS           | 1.00 equiv.                                                              | 0.98 equiv.                       | 4.7 equiv.                             |
| TFES           | 1.00 equiv.                                                              | 0.78 equiv.                       | 4.7 equiv.                             |
| IPS            | 1.00 equiv.                                                              | 0.98 equiv.                       | 1.5 equiv.                             |

The results in Table S3 also suggest that, for every gram of previously described zinc sulphinate reagent, there is ~0.6 grams of active reagent:

Table S5. Experimental values comparing the number of grams of active reagent within a gram of unpurified reagent.

| <b>Zn salt</b> | <b>Mass of unpurified <math>(\text{RSO}_2)_2\text{Zn} \cdot 2 \text{H}_2\text{O}</math></b> | <b>Mass of active <math>(\text{RSO}_2)_2\text{Zn} \cdot 2 \text{H}_2\text{O}</math></b> |
|----------------|---------------------------------------------------------------------------------------------|-----------------------------------------------------------------------------------------|
| TFMS           | 1.00 g                                                                                      | 0.66 g                                                                                  |
| DFMS           | 1.00 g                                                                                      | 0.61 g                                                                                  |
| TFES           | 1.00 g                                                                                      | 0.71 g                                                                                  |
| IPS            | 1.00 g                                                                                      | 0.72 g                                                                                  |

Elemental analysis after washing with 1:1 EtOAc: $\text{CH}_2\text{Cl}_2$  (also see attached data sheets):

Table S6. Experimental values of % by mass for the zinc sulphinates after purification.

| <b>Zn salt</b> | <b>%C</b> | <b>%H</b> | <b>%S</b> | <b>%Cl</b> |
|----------------|-----------|-----------|-----------|------------|
| TFMS           | 6.49      | 1.04      | 17.71     | 0.0        |
| DFMS           | 7.25      | 1.74      | 19.64     | 0.0        |
| TFES           | 12.04     | 2.02      | 16.45     | 0.0        |
| IPS            | 20.36     | 4.18      | 19.10     | 10.36      |

Table S7. Experimental values for the number of equivalents of each component in the product after purification.

| <b>Zn salt</b> | <b>(RSO<sub>2</sub>)<sub>2</sub>Zn • 2 H<sub>2</sub>O</b> | <b>ZnCl<sub>2</sub></b> | <b>H<sub>2</sub>O</b> |
|----------------|-----------------------------------------------------------|-------------------------|-----------------------|
| TFMS           | 1.00 equiv.                                               | 0.00 equiv.             | 0.00 equiv.           |
| DFMS           | 1.00 equiv.                                               | 0.00 equiv.             | 0.00 equiv.           |
| TFES           | 1.00 equiv.                                               | 0.00 equiv.             | 0.00 equiv.           |
| IPS            | 1.00 equiv.*                                              | 0.50 equiv.*            | 0.33 equiv.*          |

\*The structure of IPS might not be a simple mixture of ((CH<sub>3</sub>)<sub>2</sub>CH–SO<sub>2</sub>)<sub>2</sub>Zn • 2 H<sub>2</sub>O and ZnCl<sub>2</sub>.

Elemental analysis of each salt (with the exception of IPS (4)) suggests that these zinc sulphinate reagents are more likely to be dihydrates rather than anhydrous salts (the values of Table S6 resemble those of Table S2 rather than those of Table S1). In the case of IPS (4), there is a certain amount of chloride that cannot be eliminated even after many washes; see Table S8 for the amount of active reagent present in these purified salts.

Table S8. Experimental values comparing the number of grams of active reagent within a gram of purified reagent.

| <b>Zn salt</b> | <b>Mass of purified (RSO<sub>2</sub>)<sub>2</sub>Zn • 2 H<sub>2</sub>O</b> | <b>Mass of active (RSO<sub>2</sub>)<sub>2</sub>Zn • 2 H<sub>2</sub>O</b> |
|----------------|----------------------------------------------------------------------------|--------------------------------------------------------------------------|
| TFMS           | 1.00 g                                                                     | 1.00 g                                                                   |
| DFMS           | 1.00 g                                                                     | 1.00 g                                                                   |
| TFES           | 1.00 g                                                                     | 1.00 g                                                                   |
| IPS            | 1.00 g                                                                     | 0.81 g                                                                   |

While the amount of chloride in IPS (4) can be reduced after washing, comparing unpurified and purified IPS (4) in a reaction with caffeine (amount of starting material corrected for the % by mass of active reagent) showed that there is no significance difference in reactivity. As such, we recommend that IPS (4) be used in its unpurified form for operational simplicity.

## **Determination of chloride incorporation**

To test for inorganic chloride content, two methods were used, one qualitative and one quantitative.

Qualitative method:

Using QUANTOFIX<sup>®</sup> chloride test strips purchased from MACHEREY-NAGEL GmbH & Co. KG. They are similar to universal indicator papers and the procedure to use them is as follows.

1. Dissolve 10 mg of the zinc sulphinate salt in 2 mL water.
2. Place the test strip in the solution for 1 s, shake off the excess water, wait 60 s, then read against the provided chart.

Quantitative method:

Submitting samples for elemental analysis (Atlantic Microlab, Inc.). Copies of elemental analysis are provided hereafter.

Elemental analysis of TFMS (1) before washing with 1:1 EtOAc:CH<sub>2</sub>Cl<sub>2</sub>.

| <b>ATLANTIC MICROLAB, INC.</b>                                         |                             | <b>SUBMITTER</b>                          |
|------------------------------------------------------------------------|-----------------------------|-------------------------------------------|
| Sample No. <u>TFMS-B</u>                                               |                             | Company / School <u>Pfizer</u>            |
| 6180 Atlantic Blvd. Suite M<br>Norcross, GA 30071                      |                             | Address <u>10770 Science Center Drive</u> |
| <a href="http://www.atlanticmicrolab.com">www.atlanticmicrolab.com</a> |                             | Dept. <u>San Diego, CA 92121</u>          |
| PROFESSOR/SUPERVISOR: _____                                            | NAME <u>Michael Collins</u> | DATE <u>12/11/12</u>                      |
| PO# / CC#: _____                                                       | PHONE <u>8858-622-3294</u>  |                                           |
| Element                                                                | Theory                      | Found                                     |
| C                                                                      | 7.2500                      | 4.38                                      |
| Cl                                                                     | 0.0000                      | 12.47                                     |
| H                                                                      | 0.0000                      | 2.35                                      |
| S                                                                      | 19.3400                     | 11.55                                     |
|                                                                        |                             | <b>NO CHARGE FOR DUPLICATES</b>           |
| Date Received <u>DEC 13 2012</u>                                       |                             | Date Completed <u>DEC 14 2012</u>         |
| Remarks: _____                                                         |                             |                                           |

  

|                                                                                                                                                                      |                                                                                                                       |
|----------------------------------------------------------------------------------------------------------------------------------------------------------------------|-----------------------------------------------------------------------------------------------------------------------|
| Elements Present: <u>C, F, O, S, Zn</u><br>Analyze for: <u>C, Cl, H, S</u>                                                                                           | Single <input type="checkbox"/> Duplicate <input type="checkbox"/>                                                    |
| Hygroscopic <input checked="" type="checkbox"/> Explosive <input type="checkbox"/><br>M.P. _____ B.P. _____                                                          | To be dried: Yes <input type="checkbox"/> No <input checked="" type="checkbox"/><br>Temp. _____ Vac. _____ Time _____ |
| RUSH SERVICE <input type="checkbox"/> Rush service guarantees analyses will be completed and results available by 5pm EST on the day the sample is received by 11am. |                                                                                                                       |
| Include Email Address or Fax # Below<br><u>michael.collins@pfizer.com</u>                                                                                            |                                                                                                                       |

Elemental analysis of TFMS (1) after washing with 1:1 EtOAc:CH<sub>2</sub>Cl<sub>2</sub>.

**ATLANTIC MICROLAB, INC.**

Sample No. TFMS-Ascale SUBMITTER

6180 Atlantic Blvd. Suite M  
Norcross, GA 30071

Company / School Pfizer  
Address 10770 Science Center Drive  
Dept. San Diego, CA 92121

[www.atlanticmicrolab.com](http://www.atlanticmicrolab.com)  
PROFESSOR/SUPERVISOR: Michael Collins  
PO# / CC#: 858-622-3294

NAME Michael Collins  
PHONE 858-622-3294  
DATE 12/17/12

| Element                  | Theory  | Found | Single <input type="checkbox"/> | Duplicate <input type="checkbox"/> |
|--------------------------|---------|-------|---------------------------------|------------------------------------|
| C                        | 7.2500  | 6.49  |                                 |                                    |
| Cl                       | 0.0000  | 0.0   |                                 |                                    |
| H                        | 0.0000  | 1.04  |                                 |                                    |
| S                        | 19.3400 | 17.71 |                                 |                                    |
| NO CHARGE FOR DUPLICATES |         |       |                                 |                                    |

Elements Present: C, F, O, S, Zn  
Analyze for: C, Cl, H, S  
Hygroscopic  Explosive   
M.P. B.P.  
To be dried: Yes  No   
Temp. Vac. Time

RUSH SERVICE  Rush service guarantees analyses will be completed and results available by 5pm EST on the day the sample is received by 11am.

Include Email Address or Fax # Below  
michael.collins@pfizer.com

Date Received **DEC 19 2012** Date Completed **DEC 19 2012**

Remarks:



Elemental analysis of DFMS (2) before washing with 1:1 EtOAc:CH<sub>2</sub>Cl<sub>2</sub>.

## ATLANTIC MICROLAB, INC.

**Sample No.** DFMS-B  
**Company / School** Pfizer  
**Address** 10770 Science Center Drive  
**Dept.** San Diego, CA 92121  
**www.atlanticmicrolab.com**  
**PROFESSOR/SUPERVISOR:**  
**PO# / CC#:**

**SUBMITTER**  
 Michael Collins  
 DATE 12/11/12  
 PHONE 8858-622-3294

| Element | Theory  | Found | Single <input type="checkbox"/>                                                                                                                                      | Duplicate <input type="checkbox"/> |
|---------|---------|-------|----------------------------------------------------------------------------------------------------------------------------------------------------------------------|------------------------------------|
| C       | 8.1300  | 5.15  | Elements Present: C, H, F, O, S, Zn                                                                                                                                  |                                    |
| Cl      | 0.0000  | 12.83 | Analyze for: C, Cl, H, S                                                                                                                                             |                                    |
| H       | 0.6800  | 2.17  | Hygroscopic <input checked="" type="checkbox"/> Explosive <input type="checkbox"/>                                                                                   |                                    |
| S       | 21.7000 | 11.79 | M.P. _____ B.P. _____                                                                                                                                                |                                    |
|         |         |       | To be dried: Yes <input type="checkbox"/> No <input checked="" type="checkbox"/>                                                                                     |                                    |
|         |         |       | Temp. _____ Vac. _____ Time _____                                                                                                                                    |                                    |
|         |         |       | RUSH SERVICE <input type="checkbox"/> Rush service guarantees analyses will be completed and results available by 5pm EST on the day the sample is received by 11am. |                                    |
|         |         |       | Include Email Address or Fax # Below                                                                                                                                 |                                    |
|         |         |       | michael.collins@pfizer.com                                                                                                                                           |                                    |

**Date Received** DEC 13 2012  
**Date Completed** DEC 14 2012  
**Remarks:** NO CHARGE FOR DUPLICATES

Elemental analysis of DFMS (2) after washing with 1:1 EtOAc:CH<sub>2</sub>Cl<sub>2</sub>.

**ATLANTIC MICROLAB, INC.**

Sample No. DFMS-Ascale SUBMITTER

Company / School Pfizer

Address 10770 Science Center Drive

Dept. San Diego, CA 92121

**www.atlanticmicrolab.com**

PROFESSOR/SUPERVISOR: \_\_\_\_\_ NAME Michael Collins DATE 12/17/12

PO# / CC#: \_\_\_\_\_ PHONE 858-622-3294

| Element                         | Theory  | Found | Single <input type="checkbox"/> | Duplicate <input type="checkbox"/> |
|---------------------------------|---------|-------|---------------------------------|------------------------------------|
| C                               | 8.1300  | 7.25  | <input type="checkbox"/>        | <input type="checkbox"/>           |
| Cl                              | 0.0000  | 0.0   | <input type="checkbox"/>        | <input type="checkbox"/>           |
| H                               | 0.6800  | 1.74  | <input type="checkbox"/>        | <input type="checkbox"/>           |
| S                               | 21.7000 | 19.64 | <input type="checkbox"/>        | <input type="checkbox"/>           |
| <b>NO CHARGE FOR DUPLICATES</b> |         |       |                                 |                                    |

Elements Present: C, H, F, O, S, Zn

Analyze for: C, Cl, H, S

Hygroscopic  Explosive

M.P. \_\_\_\_\_ B.P. \_\_\_\_\_

To be dried: Yes  No

Temp. \_\_\_\_\_ Vac. \_\_\_\_\_ Time \_\_\_\_\_

RUSH SERVICE  Rush service guarantees analyses will be completed and results available by 5pm EST on the day the sample is received by 11am.

Include Email Address or Fax # Below

michael.collins@pfizer.com

Date Received DEC 19 2012 Date Completed DEC 19 2012

Remarks: \_\_\_\_\_

Elemental analysis of TFES (3) before washing with 1:1 EtOAc:CH<sub>2</sub>Cl<sub>2</sub>.

**ATLANTIC MICROLAB, INC.**

Sample No. IFES-A2 SUBMITTER

6180 Atlantic Blvd. Suite M  
Norcross, GA 30071

Company / School Pfizer

Address 10770 Science Center Drive

Dept. San Diego, CA 92121

[www.atlanticmicrolab.com](http://www.atlanticmicrolab.com)

PROFESSOR/SUPERVISOR: Michael Collins NAME Elohn O'Hara DATE 12/17/12

PO# / CC#: 8500164668 PHONE 858-622-3294

| Element                         | Theory | Found | Single <input type="checkbox"/> | Duplicate <input type="checkbox"/> |
|---------------------------------|--------|-------|---------------------------------|------------------------------------|
| C                               | 13.36  | 8.72  | <input type="checkbox"/>        | <input type="checkbox"/>           |
| Cl                              | 0.00   | 9.86  | <input type="checkbox"/>        | <input type="checkbox"/>           |
| H                               | 1.12   | 2.43  | <input type="checkbox"/>        | <input type="checkbox"/>           |
| S                               | 17.84  | 11.50 | <input type="checkbox"/>        | <input type="checkbox"/>           |
| <b>NO CHARGE FOR DUPLICATES</b> |        |       |                                 |                                    |

Elements C, H, O, F, S, Zn Present:

Analyze for: C, Cl, H, S

Hygroscopic  Explosive

M.P. Yes  No  B.P.

To be dried: Yes  No  Time

Temp.  Vac.

**RUSH SERVICE**  Rush service guarantees analyses will be completed and results available by 9pm EST on the day the sample is received by 11am.

Include Email Address or Fax # Below  
michael.collins@pfizer.com

Date Received JAN 24 2013 Date Completed JAN 24 2013

Remarks:

Elemental analysis of TFES (3) after washing with 1:1 EtOAc:CH<sub>2</sub>Cl<sub>2</sub>.

# ATLANTIC MICROLAB, INC.

Sample No. TFES-A3 SUBMITTER

6180 Atlantic Blvd. Suite M Company / School Pfizer  
 Norcross, GA 30071 Address 10770 Science Center Drive

[www.atlanticmicrolab.com](http://www.atlanticmicrolab.com) Dept. San Diego, CA 92121

PROFESSOR/SUPERVISOR: \_\_\_\_\_ NAME Michael Collins  
 PO# / CC#: \_\_\_\_\_ PHONE 858-622-3294 DATE 12/17/12

| Element | Theory  | Found | Single <input type="checkbox"/>                                                                                                                                                 | Duplicate <input type="checkbox"/> |
|---------|---------|-------|---------------------------------------------------------------------------------------------------------------------------------------------------------------------------------|------------------------------------|
| C       | 13.3600 | 12.04 | Elements Present: C, H, O, F, S, Zn                                                                                                                                             |                                    |
| Cl      | 0.0000  | 0.0   | Analyze for: C, Cl, H, S                                                                                                                                                        |                                    |
| H       | 1.1200  | 2.02  | Hygroscopic <input checked="" type="checkbox"/> Explosive <input type="checkbox"/>                                                                                              |                                    |
| S       | 17.8400 | 16.45 | M.P. _____ B.P. _____                                                                                                                                                           |                                    |
|         |         |       | To be dried: Yes <input type="checkbox"/> No <input checked="" type="checkbox"/>                                                                                                |                                    |
|         |         |       | Temp. _____ Vac. _____ Time _____                                                                                                                                               |                                    |
|         |         |       | RUSH SERVICE <input checked="" type="checkbox"/> Rush service guarantees analyses will be completed and results available by 5pm EST on the day the sample is received by 11am. |                                    |
|         |         |       | Include Email Address or Fax # Below                                                                                                                                            |                                    |
|         |         |       | michael.collins@pfizer.com                                                                                                                                                      |                                    |

NO CHARGE FOR DUPLICATES

Date Received DEC 19 2012 Date Completed DEC 19 2012

Remarks: \_\_\_\_\_

Elemental analysis of IPS (4) before washing with 1:1 EtOAc:CH<sub>2</sub>Cl<sub>2</sub>.

**ATLANTIC MICROLAB, INC.**

Sample No. lpr-B **SUBMITTER**

Company / School Pfizer

Address 10770 Science Center Drive

Dept. San Diego, CA 92121

[www.atlanticmicrolab.com](http://www.atlanticmicrolab.com)

PROFESSOR/SUPERVISOR: \_\_\_\_\_ NAME Michael Collins DATE 12/11/12

PO# / CC#: \_\_\_\_\_ PHONE 8858-622-3294

| Element                         | Theory  | Found | Single <input type="checkbox"/> | Duplicate <input type="checkbox"/> |
|---------------------------------|---------|-------|---------------------------------|------------------------------------|
| C                               | 25.7700 | 16.54 | 16.38                           |                                    |
| Cl                              | 0.0000  | 16.06 |                                 |                                    |
| H                               | 5.0500  | 3.95  | 4.06                            |                                    |
| S                               | 22.9300 | 14.75 |                                 |                                    |
| <b>NO CHARGE FOR DUPLICATES</b> |         |       |                                 |                                    |

Elements Present: C, H, O, S, Zn

Analyze for: C, Cl, H, S

Hygroscopic  Explosive

M.P. \_\_\_\_\_ B.P. \_\_\_\_\_

To be dried: Yes  No  Time \_\_\_\_\_

Temp. \_\_\_\_\_ Vac. \_\_\_\_\_

RUSH SERVICE  Rush service guarantees analyses will be completed and results available by 5pm EST on the day the sample is received by Tiam.

Include Email Address or Fax # Below  
michael.collins@pfizer.com

Date Received DEC 13 2012 Date Completed DEC 14 2012

Remarks: \_\_\_\_\_

Elemental analysis of IPS (4) after washing with 1:1 EtOAc:CH<sub>2</sub>Cl<sub>2</sub>.

# ATLANTIC MICROLAB, INC.

Sample No. IPS-A2

SUBMITTER

Company / School Pfizer

6180 Atlantic Blvd. Suite M  
Norcross, GA 30071

Address 10770 Science Center Drive  
Dept. San Diego, CA 92121

[www.atlanticmicrolab.com](http://www.atlanticmicrolab.com)

PROFESSOR/SUPERVISOR: \_\_\_\_\_

NAME \_\_\_\_\_

Michael Collins

DATE

12/17/12

PO# / CC#: \_\_\_\_\_

PHONE 858-622-3294

| Element                         | Theory  | Found | Single <input type="checkbox"/> | Duplicate <input type="checkbox"/> |
|---------------------------------|---------|-------|---------------------------------|------------------------------------|
| C                               | 25.7700 | 20.36 |                                 |                                    |
| Cl                              | 0.0000  | 10.36 |                                 |                                    |
| H                               | 5.0500  | 4.18  |                                 |                                    |
| S                               | 22.9300 | 19.10 |                                 |                                    |
| <b>NO CHARGE FOR DUPLICATES</b> |         |       |                                 |                                    |

Elements Present: C, H, O, S, Zn  
Analyze for: C, Cl, H, S  
Hygroscopic  Explosive   
M.P. \_\_\_\_\_ B.P. \_\_\_\_\_  
To be dried: Yes  No   
Temp. \_\_\_\_\_ Vac. \_\_\_\_\_ Time \_\_\_\_\_  
RUSH SERVICE  Rush service guarantees analyses will be completed and results available by 5pm EST on the day the sample is received by 11am

Include Email Address or Fax # Below

michael.collins@pfizer.com

DEC 19 2012

DEC 19 2012

Date Received \_\_\_\_\_

Date Completed \_\_\_\_\_

Remarks:
